# Supplementary material
Source: PubMed Central journal article supplement (PMC4250100)
Supplement: pnas.201412449SI.pdf [file pnas.201412449SI.pdf]

# Supporting Information

Tóth et al. 10.1073/pnas.1412449111

## SI Materials and Methods

**NUDT9 Expression and Purification.** The cDNA for full-length mature human NUDT9 (residues 59–350) in the pJ411 vector was obtained from DNA2.0, included a C-terminal His<sub>6</sub>-tag, and was codon-optimized (for *E. coli*). *E. coli* BL21 (DE3) strain was transfected with NUDT9-pJ411, grown at 37 °C in LB medium supplemented with 50 µg/mL kanamycin B sulfate, induced with 1 mM isopropyl-β-D-1-thiogalactopyranoside (IPTG), and further incubated for 3 h. Cells were harvested, resuspended in lysis buffer (20 mM Tris at pH 8.5, 100 mM NaCl) with added Halt Protease and Phosphatase Inhibitor Mixture (Thermo Scientific), and sonicated. The lysate was centrifuged (7,000 × g, 15 min, 4 °C) and the cleared supernatant was mixed with Ni-Sepharose 6 Fast Flow resin (GE Healthcare) for 3 h. The resin was then washed with 10 column volumes of lysis buffer, followed by 10 column volumes of lysis buffer containing 20 mM imidazole. The protein was eluted in a single step with lysis

buffer containing 400 mM imidazole. The eluate was concentrated to ~0.5 mL and loaded onto a Superdex 200 10/300 GL gel filtration column (GE Healthcare). Fractions containing monomeric NUDT9 were collected and dialyzed two times against 2 L of 20 mM Tris at pH 8.5. The final protein concentration was colorimetrically estimated to be ~18 µM (~0.6 mg/mL).

**Enzymatic Assays and TLC.** The enzymatic activity of NUDT9 was assessed in 20-µL reactions containing 1 µM purified NUDT9 and 20 mM nucleotide [ADPR, AMP, or AMPCPR; enzyme-to-substrate ratio, 1:20,000 (mol/mol)] in 50 mM Tris (pH, 8.5) supplemented with 16 mM MgCl<sub>2</sub>. The reactions were incubated for 1 h at 37 °C. The respective controls did not contain NUDT9 and were treated identically. One-microliter aliquots from each reaction were placed on Polygram SIL G/UV<sub>254</sub> plates (Macherey-Nagel) and developed in 200 mM NH<sub>4</sub>HCO<sub>3</sub> in ethanol:water 7:3 (vol/vol). Nucleotides were visualized under UV light.

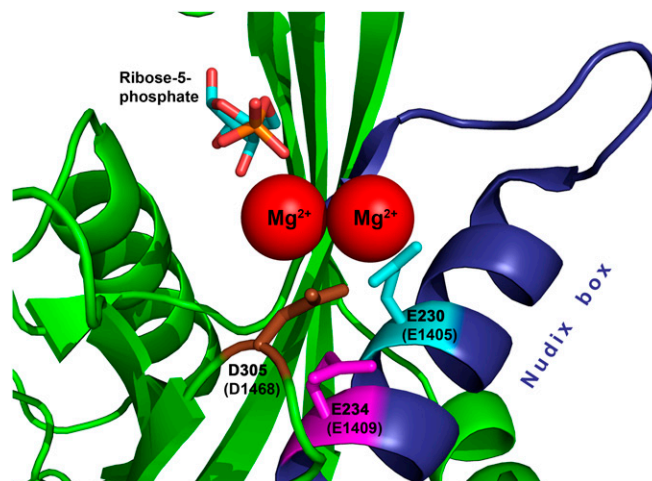

**Fig. S1.** Structure of the ligand-binding cleft in NUDT9. Ribbon diagram illustrating the ADPR binding cleft of human NUDT9 with bound ribose-5-phosphate, generated (PyMOL) from the coordinates of its crystal structure (PDB ID code 1QVJ). Residues discussed in the main text are highlighted. The Nudix motif is in dark blue. The ribose-5-phosphate (in sticks) is coordinated by Mg<sup>2+</sup> ions (red spheres), stabilized by residue E230 (cyan; this residue aligns with I1405 in the NUDT9-H domain of TRPM2). Substitution of conserved residue E234 (magenta), corresponding to E1409 in NUDT9-H, destroys the enzymatic activity of NUDT9. Residue D305 (brown), downstream of the Nudix motif, aligns with the proposed catalytic base of *E. coli* ADPRase; the functionally equivalent residue in TRPM2 is D1468.

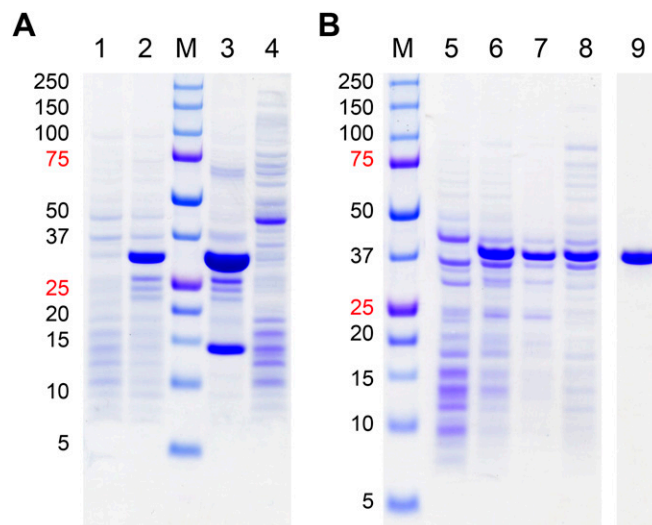

**Fig. S2.** Expression and solubility of NUDT9-H and NUDT9. Coomassie-stained SDS/PAGE images showing the expression and solubility of (A) NUDT9-H and (B) NUDT9. Total cell pellets of noninduced (lanes 1 and 5) and induced (lanes 2 and 6) *E. coli* BL21 (DE3) show the overexpressed protein. On sonication, NUDT9-H is found predominantly in the pellet fraction (lane 3) and not in the supernatant (lane 4), whereas NUDT9 is only partially lost in the pellet (lane 7) and is also abundantly present in the supernatant (lane 8). After solubilization of the NUDT9-H inclusion bodies using 7 M urea or 6 M guanidine/HCl, the protein reprecipitated on dilution of the chaotropic agent. Lane 9 shows NUDT9 purified from the supernatant by Ni-affinity chromatography, followed by gel filtration. Numbers on the left of the gel images identify the sizes (in kDa) of the size marker ladder (Precision, Bio-Rad) bands (lanes M).

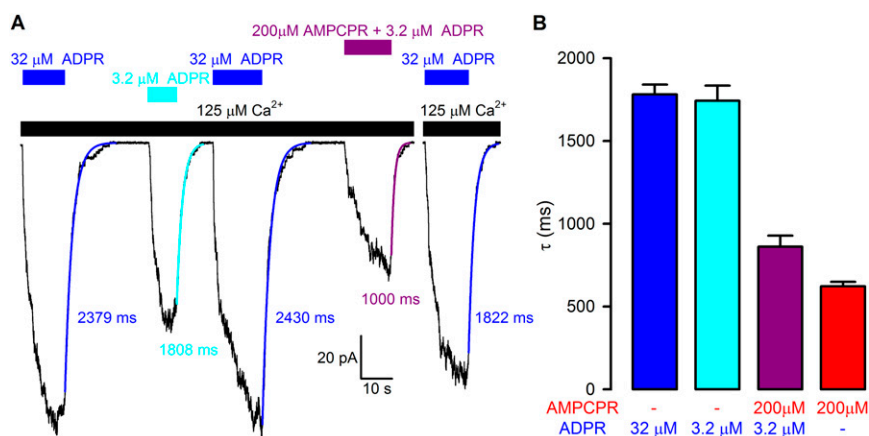

**Fig. S3.** Mixtures of ADPR and AMPCPR do not arrest TRPM2 channels in the bursting state. (A) Decay time courses on nucleotide removal of macroscopic T5L-TRPM2 currents activated in the presence of saturating  $Ca^{2+}$  by brief applications of saturating (32 μM) ADPR (blue bars), 3.2 μM ADPR (cyan bar), or a mixture of 200 μM AMPCPR plus 3.2 μM ADPR (purple bar); for both nucleotides, the latter concentrations are  $\sim 3 \times K_{1/2}$  (cf. Fig. 3C). Colored lines are single-exponential fits, with time constants indicated. (B) Mean  $\pm$  SEM deactivation time constants of T5L-TRPM2 channels opened by 32 μM ADPR (blue, replotted from Fig. 4C), 3.2 μM ADPR (cyan), 3.2 μM ADPR + 200 μM AMPCPR (purple), or 200 μM AMPCPR (red, replotted from Fig. 4C), from experiments such as the ones shown in A.
